# Supplementary material for: A Quorum Sensing-Regulated Type VI Secretion System Containing Multiple Nonredundant VgrG Proteins Is Required for Interbacterial Competition in Chromobacterium violaceum
Source: PubMed Central journal article supplement (PMC9430734; doi:10.1128/spectrum.01576-22), 2022-07-25
Supplement: spectrum.01576-22-s0001.pdf [file spectrum.01576-22-s0001.pdf]

## SUPPLEMENTAL MATERIAL

**Table S1.** Bacterial strains and plasmids

| Bacterial strain or plasmid      | Description                                                                          | Reference |
|----------------------------------|--------------------------------------------------------------------------------------|-----------|
| <i>Escherichia coli</i>          |                                                                                      |           |
| DH5 $\alpha$                     | Strain for cloning purposes                                                          | (1)       |
| S17-1                            | Strain for plasmid mobilization                                                      | (2)       |
| BL21(DE3)                        | Strain for protein expression                                                        | Novagen   |
| <i>Chromobacterium violaceum</i> |                                                                                      |           |
| ATCC 12472                       | Wild type (Sequenced genome)                                                         | (3)       |
| $\Delta clpV$ (CV_3965)          | WT strain with CV_3965 gene deleted                                                  | This work |
| $\Delta hcp$ (CV_3977)           | WT strain with CV_3977 gene deleted                                                  | This work |
| $\Delta vipA$ (CV_3979)          | WT strain with CV_3979 gene deleted                                                  | This work |
| $\Delta vgrG1$ (CV_3986)         | WT strain with CV_3986 gene deleted                                                  | This work |
| $\Delta vgrG2$ (CV_3975)         | WT strain with CV_3975 gene deleted                                                  | This work |
| $\Delta vgrG3$ (CV_1432)         | WT strain with CV_1432 gene deleted                                                  | This work |
| $\Delta vgrG4$ (CV_1233)         | WT strain with CV_1233 gene deleted                                                  | This work |
| $\Delta vgrG5$ (CV_0023)         | WT strain with CV_0023 gene deleted                                                  | This work |
| $\Delta vgrG6$ (CV_0016)         | WT strain with CV_0016 gene deleted                                                  | This work |
| $\Delta vgrG1-2$                 | WT strain with CV_3986 and CV_3975 genes deleted                                     | This work |
| $\Delta vgrG1-3$                 | WT strain with CV_3986, CV_3975 and CV_1432 genes deleted                            | This work |
| $\Delta vgrG1-4$                 | WT strain with CV_3986, CV_3975, CV_1432 and CV_1233 genes deleted                   | This work |
| $\Delta vgrG1-5$                 | WT strain with CV_3986, CV_3975, CV_1432, CV_1233 and CV_0023 genes deleted          | This work |
| $\Delta vgrG1-6$                 | WT strain with CV_3986, CV_3975, CV_1432, CV_1233, CV_0023 and CV_0016 genes deleted | This work |
| $\Delta cviR$                    | WT strain with CV_4090 gene deleted                                                  | (4)       |
| $\Delta cvil$                    | WT strain with CV_4091 gene deleted                                                  | (5)       |
| WT(pSEVA)                        | WT strain containing the empty vector pSEVA                                          | This work |
| $\Delta vgrG3$ (pSEVA)           | $\Delta vgrG3$ strain containing the empty vector pSEVA                              | This work |
| $\Delta vgrG3(vgrG3)$            | In trans complementation of <i>vgrG3</i> with pSEVA vector in $\Delta vgrG3$         | This work |
| WT(pMR20)                        | WT strain containing the empty vector pMR20                                          | This work |
| $\Delta hcp(hcp)$                | In trans complementation of <i>hcp</i> with pMR20 vector in $\Delta hcp$             | This work |
| $\Delta vipA(vipA)$              | In trans complementation of <i>vipA</i> with pMR20 vector in $\Delta vipA$           | This work |

|                                        |                                                                                                        |           |
|----------------------------------------|--------------------------------------------------------------------------------------------------------|-----------|
| $\Delta vgrG1-6(vgrG1)$                | In trans complementation of <i>vgrG1</i> with pMR20 vector in the sextuple mutant ( $\Delta vgrG1-6$ ) | This work |
| $\Delta vgrG1-6(vgrG2)$                | In trans complementation of <i>vgrG2</i> with pMR20 vector in the sextuple mutant ( $\Delta vgrG1-6$ ) | This work |
| $\Delta vgrG1-6(vgrG3)$                | In trans complementation of <i>vgrG3</i> with pMR20 vector in the sextuple mutant ( $\Delta vgrG1-6$ ) | This work |
| $\Delta vgrG1-6(vgrG4)$                | In trans complementation of <i>vgrG4</i> with pMR20 vector in the sextuple mutant ( $\Delta vgrG1-6$ ) | This work |
| $\Delta vgrG1-6(vgrG5)$                | In trans complementation of <i>vgrG5</i> with pMR20 vector in the sextuple mutant ( $\Delta vgrG1-6$ ) | This work |
| $\Delta vgrG1-6(vgrG6)$                | In trans complementation of <i>vgrG6</i> with pMR20 vector in the sextuple mutant ( $\Delta vgrG1-6$ ) | This work |
| WT(pCV_3981)                           | WT strain containing the promoter of CV_3981 with <i>lacZ</i> fusion                                   | This work |
| $\Delta cviR$ (pCV_3981)               | $\Delta cviR$ strain containing the promoter of CV_3981 with <i>lacZ</i> fusion                        | This work |
| WT(pCV_3982)                           | WT strain containing the promoter of CV_3982 with <i>lacZ</i> fusion                                   | This work |
| $\Delta cviR$ (pCV_3982)               | $\Delta cviR$ strain containing the promoter of CV_3982 with <i>lacZ</i> fusion                        | This work |
| WT(pvgrG1)                             | WT strain containing the promoter of <i>vgrG1</i> with <i>lacZ</i> fusion                              | This work |
| WT(pvgrG2)                             | WT strain containing the promoter of <i>vgrG2</i> with <i>lacZ</i> fusion                              | This work |
| WT(pvgrG3)                             | WT strain containing the promoter of <i>vgrG3</i> with <i>lacZ</i> fusion                              | This work |
| WT(pvgrG4)                             | WT strain containing the promoter of <i>vgrG4</i> with <i>lacZ</i> fusion                              | This work |
| WT(pvgrG5)                             | WT strain containing the promoter of <i>vgrG5</i> with <i>lacZ</i> fusion                              | This work |
| WT(pvgrG6)                             | WT strain containing the promoter of <i>vgrG6</i> with <i>lacZ</i> fusion                              | This work |
| $\Delta cviR$ (pvgrG3)                 | $\Delta cviR$ strain containing the promoter of <i>vgrG3</i> with <i>lacZ</i> fusion                   | This work |
| $\Delta cviR$ (pvgrG4)                 | $\Delta cviR$ strain containing the promoter of <i>vgrG4</i> with <i>lacZ</i> fusion                   | This work |
| WT( <i>vipA_sfGFP</i> )                | WT with <i>vipA_sfGFP</i> cloned into pJN105 vector for L-arabinose induction                          | This work |
| $\Delta clpV$ ( <i>vipA_sfGFP</i> )    | $\Delta clpV$ with <i>vipA_sfGFP</i> cloned into pJN105 vector for L-arabinose induction               | This work |
| $\Delta hcp$ ( <i>vipA_sfGFP</i> )     | $\Delta hcp$ with <i>vipA_sfGFP</i> cloned into pJN105 vector for L-arabinose induction                | This work |
| $\Delta vgrG3$ ( <i>vipA_sfGFP</i> )   | $\Delta vgrG3$ with <i>vipA_sfGFP</i> cloned into pJN105 vector for L-arabinose induction              | This work |
| $\Delta vgrG1-3$ ( <i>vipA_sfGFP</i> ) | $\Delta vgrG1-3$ with <i>vipA_sfGFP</i> cloned into pJN105 vector for L-arabinose induction            | This work |

|                               |                                                                                                                               |           |
|-------------------------------|-------------------------------------------------------------------------------------------------------------------------------|-----------|
| $\Delta vgrG1-6(vipA\_sfGFP)$ | $\Delta vgrG1-6$ with <i>vipA_sfGFP</i> cloned into pJN105 vector for L-arabinose induction                                   | This work |
| $\Delta cviR(vipA\_sfGFP)$    | $\Delta cviR$ with <i>vipA_sfGFP</i> under L-arabinose induction                                                              | This work |
| $\Delta cvil(vipA\_sfGFP)$    | $\Delta cvil$ with <i>vipA_sfGFP</i> under L-arabinose induction                                                              | This work |
| $\Delta vgrG3(vgrG3-HA)$      | $\Delta vgrG3$ in trans complemented with pMR20 expressing <i>vgrG3</i> gene fused to hemagglutinin tag at C-terminal portion | This work |
| <b>Plasmids</b>               |                                                                                                                               |           |
| pNPTS138                      | Suicide vector containing oriT, Km <sup>r</sup> , <i>sacB</i>                                                                 | D. Alley  |
| pJN105                        | Broad-host-range vector, araC-PBAD cassette; Gm <sup>r</sup>                                                                  | (6)       |
| pMR20                         | Broad-host-range low-copy vector containing oriT, Tet <sup>R</sup>                                                            | (7)       |
| pET-15b                       | His-tagged protein expression vector; Amp <sup>r</sup>                                                                        | Novagen   |
| pGEM-T easy                   | Cloning plasmid; Amp <sup>R</sup>                                                                                             | Promega   |
| pRKlacZ290                    | Vector containing promoterless <i>E. coli lacZ</i> . Tet <sup>R</sup>                                                         | (8)       |
| pSEVA221                      | Broad-host-range vector, Km <sup>R</sup> , <i>oriRK2</i> , <i>oriT</i> .                                                      | (9)       |

- Hanahan D. 1983. Studies on transformation of *Escherichia coli* with plasmids. *J Mol Biol* 166(4):557-580.
- Simon R, Priefer U, Puhler A. 1983. A broad host range mobilization system for *in vivo* genetic engineering: transposon mutagenesis in Gram-negative bacteria. *Bio/Technology* 1:784–791.
- Brazilian National Genome Project Consortium. 2003. The complete genome sequence of *Chromobacterium violaceum* reveals remarkable and exploitable bacterial adaptability. *Proc Natl Acad Sci U S A* 100(20):11660-11665.
- Batista JH, Leal FC, Fukuda TTH, Alcoforado Diniz J, Almeida F, Pupo MT, da Silva Neto JF. 2020. Interplay between two quorum sensing-regulated pathways, violacein biosynthesis and VacJ/Yrb, dictates outer membrane vesicle biogenesis in *Chromobacterium violaceum*. *Environ Microbiol* 22(6):2432–2442.
- Barroso KCM, Previato-Mello M, Batista BB, Batista JH, da Silva Neto JF. 2018. EmrR-Dependent Upregulation of the Efflux Pump EmrCAB Contributes to Antibiotic Resistance in *Chromobacterium violaceum*. *Front Microbiol* 9:2756.
- Newman JR, Fuqua C. 1999. Broad-host-range expression vectors that carry the L-arabinose-inducible *Escherichia coli araBAD* promoter and the *araC* regulator. *Gene* 227(2):197-203.
- Roberts RC, Toochinda C, Avedissian M, Baldini RL, Gomes SL, Shapiro L. 1996. Identification of a *Caulobacter crescentus* operon encoding *hrcA*, involved in negatively regulating heat-inducible transcription, and the chaperone gene *grpE*. *J Bacteriol* 178(7):1829-1841.
- Gober JW, Shapiro L. 1992. A developmentally regulated *Caulobacter* flagellar promoter is activated by 3' enhancer and IHF binding elements. *Mol Biol Cell* 3(8):913-26.
- Silva-Rocha R, Martínez-García E, Calles B, Chavarría M, Arce-Rodríguez A, de Las Heras A, Páez-Espino AD, Durante-Rodríguez G, Kim J, Nickel PI, Platero R, de Lorenzo V. 2013. The Standard European Vector Architecture (SEVA): a coherent platform for the analysis and deployment of complex prokaryotic phenotypes. *Nucleic Acids Res* 41:D666–D675.

**Table S2. Primers used in this work**

| Name                                        | Sequence 5' - 3' *                                                                      | Description                                                                                             |
|---------------------------------------------|-----------------------------------------------------------------------------------------|---------------------------------------------------------------------------------------------------------|
| <b>Construction of mutant strains</b>       |                                                                                         |                                                                                                         |
| CV_3965 del1<br>CV_3965 del2                | GATCATAAGCTTGATTGATGGGGCGTGGGAAG<br>GATCATGAATTCGGTCAACCGGTCTATCAGGG                    | 767 pb, <i>HindIII/EcoRI</i> .<br>CV_3965 deletion                                                      |
| CV_3965 del3<br>CV_3965 del4                | GATCATGAATTCGGTATGGCCAGCGGCAAACC<br>GATCATGTCTGACGCTTCAGTTCCTTGACCCGG                   | 652 pb, <i>EcoRI/SalI</i> . CV_3965<br>deletion                                                         |
| CV_3977 del1<br>CV_3977 del2                | GATCATAAGCTTGAAGTGGCGCTGAAGTGCCC<br>GATCATCTGCAGGCTTTCGCCAGGAATGCCATC                   | 633 pb, <i>HindIII/PstI</i> . CV_3977<br>deletion                                                       |
| CV_3977 del3<br>CV_3977 del4                | GATCATCTGCAGGGCAATGTCAGCGCCGGTTG<br>GATCATGGATCCGAGAGCTAAGTCCATGGCG                     | 687 pb, <i>PstI/BamHI</i> . CV_3977<br>deletion                                                         |
| CV_3979 del1<br>CV_3979 del2                | GACTATGGGCCCATTCCTGTCCGCGAGCCTG<br>GACTATGGATCCGCCGATCTCGACGTCATAGG                     | 607 pb, <i>ApaI/BamHI</i> . CV_3979<br>deletion                                                         |
| CV_3979 del3<br>CV_3979 del4                | GACTATGGATCCGACGAAGTGGTGGCGGATAC<br>GACTATGAATTCACCACAGCGCGGCGTAAG                      | 547 pb, <i>BamHI/EcoRI</i> .<br>CV_3979 deletion                                                        |
| CV_3986 del1<br>CV_3986 del2                | TACCGGAAGCTTGTACTTCGCGCTATTGGCC<br>TACCGGGATCCGGTGGTACGATCCATGATCG                      | 606 pb, <i>HindIII/BamHI</i> .<br>CV_3986 deletion                                                      |
| CV_3986 del3<br>CV_3986 del4                | TACCGGGATCCCTGAATGCGATCAAATCCGGC<br>TACCGGAATTCCTGGCCAATGCATCGGGCTC                     | 663 pb, <i>BamHI/EcoRI</i> .<br>CV_3986 deletion                                                        |
| CV_3975 del1<br>CV_3975 del2                | TACCGGAAGCTTGCCCCGGGCGGGTTTTAAG<br>TACCGGGATCCGTCCATGGCGCAATCTATCCG                     | 598 pb, <i>HindIII/BamHI</i> .<br>CV_3975 deletion                                                      |
| CV_3975 del3<br>CV_3975 del4                | TACCGGGATCCGTGGCCGCAAATGAAGCCG<br>TACCGGAATTCCEAACAGGTGGTTTTGCCGC                       | 660 pb, <i>BamHI/EcoRI</i> .<br>CV_3975 deletion                                                        |
| CV_1432 del1<br>CV_1432 del2                | TACCGGAAGCTTCGGCCGCCAACTACTAGTC<br>TACCGGGATCCGTCAAGTCCATCGATTGTCC                      | 626 pb, <i>HindIII/BamHI</i> .<br>CV_1432 deletion                                                      |
| CV_1432 del3<br>CV_1432 del4                | TACCGGGATCCTCCCTTCGTAGAGCAGCC<br>TACCGGAATTCGGCAGGAACGACGCCAATC                         | 603 pb, <i>BamHI/EcoRI</i> .<br>CV_1432 deletion                                                        |
| CV_1233 del1<br>CV_1233 del2                | TACCGGAAGCTTCCAGGCTTCCAGATACTGCG<br>TACCGGGATCCACTGGCTAGCAATGCGTTCAG                    | 611 pb, <i>HindIII/BamHI</i> .<br>CV_1233 deletion                                                      |
| CV_1233 del3<br>CV_1233 del4                | TACCGGGATCCCATTTCAACATGGTGGCGTCCG<br>TACCGGAATTCCTCCAGCGACTTCATTTT                      | 583 pb, <i>BamHI/EcoRI</i> .<br>CV_1233 deletion                                                        |
| CV_0023 del1<br>CV_0023 del2                | TACCGGAAGCTTTGGCATGTTGGCAACAGGCG<br>TACCGGGATCCAGATCCATCGGGCTTCCAG                      | 593 pb, <i>HindIII/BamHI</i> .<br>CV_0023 deletion                                                      |
| CV_0023 del3<br>CV_0023 del4                | TACCGGGATCCCGACGCTCCCAAAGACAA<br>TACCGGAATTCATAGAACGGTGTGCCGG                           | 657 pb, <i>BamHI/EcoRI</i> .<br>CV_0023 deletion                                                        |
| CV_0016 del1<br>CV_0016 del2                | TACCGGGGCCCCGAGATGCTAAGGCCGGTGAC<br>TACCGGGATCCGAAGCTGGAGAGGAGGCTGT                     | 592 pb, <i>ApaI/BamHI</i> . CV_0016<br>deletion                                                         |
| CV_0016 del3<br>CV_0016 del4                | TACCGGGATCCGCGAGTACCAACTTGCCCTTC<br>TACCGGTCGACCTCCCATGAAATGGATGGCG                     | 632 pb, <i>BamHI/SalI</i> . CV_0016<br>deletion                                                         |
| <b>Construction of complemented strains</b> |                                                                                         |                                                                                                         |
| CV_3977 Comp Fw<br>CV_3977 Comp Rv          | GATCATCTGCAGGAAGCCAAGGCCAAGTACCC<br>GATCATGAGCTCCGCAAGACAAGGCGACAACC                    | 852 pb, <i>PstI/SacI</i> . Product with<br><i>hcp</i> gene and its promoter region                      |
| CV_3979 Comp Fw<br>CV_3979 Comp Rv          | GACTATGAATTCGGGGCGCAATTGAACGATC<br>GACTATGAGCTCCGATGATGCTGTCGAGCAGG                     | 699 pb, <i>EcoRI/SacI</i> . Product<br>with <i>vipA</i> gene and its promoter<br>region                 |
| CV_3979 Over Fw<br>CV_3979_sfgfp Rv         | GACTATGAATTCGAACATCTTGTAGAGAAGAGCC<br>GACTATCTGCAGGGGGGGGCGGCGCGCTGCT<br>CGCCTCCTTCTTCT | 526 pb, <i>PstI/EcoRI</i> . <i>vipA</i> full<br>gene plus 3 Gly x 3 Ala linker                          |
| sfGFP_Fw<br>sfGFP_Rv                        | GACTATCTGCAGATGTCGAAAAGGAGAAGAAGTGT<br>GACTATGAGCTCTTTATACAGTTCATCCATTCCATG             | 714 pb, <i>PstI/SacI</i> . Product with<br>super folder GFP for cloning<br>with <i>vipA</i> into pJN105 |
| CV_3977 Exp Fw<br>CV_3977 Exp Rv            | GATCACATATGGCTTTTGATGCATTCTGAAAATC<br>GATCAGGATCCTTAGGCGATTACTTTGTTCGCG                 | 498 pb, <i>NdeII/BamHI</i> . Product<br>with <i>hcp</i> gene for heterologous<br>expression             |
| CV_3986 Comp Fw<br>CV_3986 Comp Rv          | TACCGGGGTACCCTCGATCGAGCTGCATGAGC<br>TACCGGGATCCCATCCCCCTGTCCATTGCG                      | 2861 pb, <i>KpnI/BamHI</i> .<br>CV_3986 complementation                                                 |
| CV_3975 Comp Fw<br>CV_3975 Comp Rv          | TACCGGGTACCCTCCCAATGTGCGCGATTAC<br>TACCGGGATCCGGTGTCTTGCAACAGCATGC                      | 3019 pb, <i>KpnI/BamHI</i> .<br>CV_3975 complementation                                                 |
| CV_1432 Comp Fw<br>CV_1432 Comp Rv          | TACCGGGTACCCTGCTCTCATGATCTTGCC<br>TACCGGGATCCGCTATGGGTGCGGTCATGGC                       | 3554 pb, <i>KpnI/BamHI</i> .<br>CV_1432 complementation                                                 |

|                                    |                                                                                                    |                                                                                                                |
|------------------------------------|----------------------------------------------------------------------------------------------------|----------------------------------------------------------------------------------------------------------------|
| CV_1432-HA_TagCompRv               | TACCGGGGATCCTCAAGCGTAGTCTGGGACGTCGT<br>ATGGGTAAGCGTAGTCTGGGACGTCGTATGGGTAG<br>AACAGTTTGGGCAGGCTGGG | Primer used with CV_1432<br>Comp Fw. 3568 pb, <i>BamHI</i> .<br>CV_1432 fused to HA epitope<br>complementation |
| CV_1233 Comp Fw<br>CV_1233 Comp Rv | TACCGGGGTACCCAGGCTTCCAGATACTGCG<br>TACCGGGAATTCGACGCGGTTATGCTTGCC                                  | 3506 pb, <i>KpnI/EcoRI</i> . CV_1233<br>complementation                                                        |
| CV_0023 Comp Fw<br>CV_0023 Comp Rv | TACCGGGGTACCCGGTCCCAAGTCTTGCTGTG<br>TACCGGGGATCCCTCGGGAAGAGAACGGCATC                               | 2952 pb, <i>KpnI/BamHI</i> .<br>CV_0023 complementation                                                        |
| CV_0016 Comp Fw<br>CV_0016 Comp Rv | TACCGGGGTACCGAGATGCTAAGGCCGGTGAC<br>TACCGGGGATCCCGGCTCTACCAGTAATC                                  | 3234 pb, <i>KpnI/BamHI</i> .<br>CV_0016 complementation                                                        |
| <b>B-galactosidase assay</b>       |                                                                                                    |                                                                                                                |
| pCV_3981Fw<br>pCV_3981Rv           | GATCATGGATCCGCCAAGCACATTCTCGATTGG<br>GATCATAAGCTTTCGCGATTGTCGCCTGTTCCAC                            | 531 pb, <i>BamHI/HindIII</i> .<br>Promoter region of CV_3981<br>for pRKlacZ290 cloning                         |
| pCV_3982Fw<br>pCV_3982Rv           | GATCATAAGCTTTCGCGAAGCACATTCTCGATTGG<br>GATCATGGATCCGCGATTGTCGCCTGTTCCAC                            | 531 pb, <i>HindIII/BamHI</i> .<br>Promoter region of CV_3982<br>for pRKlacZ290 cloning                         |

\* Underlined letters indicate the restriction enzyme recognition sites

**Table S3.** Bacteria strains used as prey in interbacterial competition assay

| Bacteria                            | Strain        | Abbreviation * |
|-------------------------------------|---------------|----------------|
| <i>Burkholderia cepacia</i>         | ATCC 17759    | Bc             |
| <i>Escherichia coli</i>             | ATCC 25922    | Ec             |
| <i>Pseudomonas aeruginosa</i>       | ATCC 27853    | Pa             |
| <i>Staphylococcus aureus</i>        | ATCC 29313    | Sa             |
| <i>Salmonella typhimurium</i>       | ATCC 14028    | St             |
| <i>Stenotrophomonas maltophilia</i> | ATCC 13637    | Sma            |
| <i>Enterobacter cloacae</i>         | ATCC 13047    | Ecl            |
| <i>Shigella flexneri</i>            | ATCC 12022    | Sf             |
| <i>Enterococcus faecium</i>         | NCTC 13047    | Ef             |
| <i>Klebsiella pneumoniae</i>        | ATCC 13883    | Kp             |
| <i>Klebsiella pneumoniae</i>        | ATCC BAA-1705 | Kpn            |
| <i>Enterococcus faecalis</i>        | ATCC 4083     | Efa            |
| <i>Shigella sonnei</i>              | ATCC 25931    | Ss             |
| <i>Pseudomonas aeruginosa</i>       | PAO1          | Pao            |

\*Abbreviation referring to **Figure 2A**

**Table S4.** Proteins identified in coimmunoprecipitation assay of WT(pMR20) and  $\Delta vgrG3(vgrG3\text{-HA})$

| <b>WT(pMR20)</b>                                  |                                                 |                |                 |                     |                 |                      |
|---------------------------------------------------|-------------------------------------------------|----------------|-----------------|---------------------|-----------------|----------------------|
| <b>Accession*</b>                                 | <b>Description</b>                              | <b>mW (Da)</b> | <b>Peptides</b> | <b>Coverage (%)</b> | <b>Products</b> | <b>Amount (fmol)</b> |
| <b>Q7M7F1</b>                                     | Elongation factor Tu                            | 43045          | 92              | 86,3636             | 974             | 32,4532              |
| Q7NQE7                                            | DNA-directed RNA polymerase subunit beta'       | 155194         | 86              | 63,8252             | 640             | 2,0263               |
| <b>Q7NQF0</b>                                     | Elongation factor G                             | 76958          | 60              | 79,7994             | 442             | 1,4946               |
| <b>Q7NQG4</b>                                     | 50S ribosomal protein L5                        | 20292          | 14              | 46,3687             | 70              | 0,3518               |
| <b>Q7NQG5</b>                                     | 30S ribosomal protein S14                       | 11589          | 7               | 38,6139             | 18              | 0,4214               |
| <b>Q7NQG8</b>                                     | 50S ribosomal protein L18                       | 12765          | 9               | 64,1026             | 52              | 0,5157               |
| <b>Q7NQG9</b>                                     | 30S ribosomal protein S5                        | 18207          | 14              | 47,6744             | 81              | 0,1538               |
| Q7NQM5                                            | Aspartate ammonia-lyase                         | 50287          | 24              | 76,8737             | 218             | 0,9885               |
| <b>Q7NQX1</b>                                     | 60 kDa chaperonin 2                             | 57382          | 40              | 69,7802             | 347             | 1,5874               |
| Q7NR97                                            | Nudix hydrolase domain-containing protein       | 23223          | 10              | 66,8269             | 105             | 0,1679               |
| <b>Q7NUY8</b>                                     | Trigger factor                                  | 48546          | 34              | 81,3793             | 262             | 1,2455               |
| Q7NV09                                            | Uncharacterized protein                         | 6615           | 3               | 68,3333             | 38              | 0,0807               |
| Q7NV22                                            | Probable transmembrane protein                  | 13147          | 4               | 71,7742             | 53              | 0,0143               |
| Q7NVZ4                                            | 30S ribosomal protein S2                        | 27112          | 18              | 69,1358             | 111             | 1,3853               |
| Q7NWX4                                            | Phosphonate metabolism protein PhnH             | 20435          | 6               | 54,2105             | 66              | 0,0398               |
| Q7NX50                                            | Probable transcriptional regulator_ MerR family | 15218          | 9               | 58,4615             | 100             | 0,0483               |
| Q7NZ92                                            | Uncharacterized protein                         | 10198          | 4               | 43,8202             | 40              | 0,5778               |
| <b>Q7P095</b>                                     | ATP synthase subunit beta                       | 50024          | 40              | 81,0753             | 434             | 2,0939               |
| <b>Q7P097</b>                                     | ATP synthase subunit alpha                      | 54676          | 36              | 69,0661             | 327             | 2,4705               |
| <b>Q7P0N9</b>                                     | Acetyltransferase component                     | 56484          | 19              | 49,0975             | 210             | 1,8117               |
| Q7P0P0                                            | Pyruvate dehydrogenase E1 component             | 99230          | 67              | 81,2852             | 584             | 2,3749               |
| <b><math>\Delta vgrG3(vgrG3\text{-HA})</math></b> |                                                 |                |                 |                     |                 |                      |
| <b>Accession</b>                                  | <b>Description</b>                              | <b>mW (Da)</b> | <b>Peptides</b> | <b>Coverage (%)</b> | <b>Products</b> | <b>Amount (fmol)</b> |
| <b>Q7M7F1</b>                                     | Elongation factor Tu                            | 43045          | 54              | 72,2222             | 714             | 45,6856              |
| <b>Q7NQF0</b>                                     | Elongation factor G                             | 76958          | 39              | 55,5874             | 313             | 2,9557               |
| Q7NQF9                                            | 50S ribosomal protein L16                       | 15401          | 4               | 30,4348             | 49              | 5,6009               |
| Q7NQG2                                            | 50S ribosomal protein L14                       | 13409          | 15              | 51,6393             | 89              | 3,7829               |
| <b>Q7NQG4</b>                                     | 50S ribosomal protein L5                        | 20292          | 16              | 65,3631             | 108             | 0,739                |
| <b>Q7NQG5</b>                                     | 30S ribosomal protein S14                       | 11589          | 5               | 45,5446             | 56              | 4,4619               |
| <b>Q7NQG8</b>                                     | 50S ribosomal protein L18                       | 12765          | 7               | 52,9915             | 88              | 9,9647               |
| <b>Q7NQG9</b>                                     | 30S ribosomal protein S5                        | 18207          | 18              | 59,8837             | 149             | 3,5319               |
| Q7NQH0                                            | 50S ribosomal protein L30                       | 6780           | 5               | 37,7049             | 33              | 1,1832               |
| <b>Q7NQX1</b>                                     | 60 kDa chaperonin                               | 57382          | 18              | 46,1538             | 164             | 2,9832               |
| Q7NQZ9                                            | VgrG1 (CV_3986)                                 | 93995          | 27              | 41,7431             | 314             | 0,2691               |
| Q7NR08                                            | Hcp (CV_3977)                                   | 17881          | 8               | 53,3333             | 81              | 0,9134               |
| Q7NR10                                            | VgrG2 (CV_3975)                                 | 94022          | 20              | 35,8945             | 255             | 1,3435               |
| Q7NRL5                                            | 30S ribosomal protein S21                       | 8490           | 2               | 28,5714             | 19              | 1,6007               |

|               |                                   |        |    |         |     |         |
|---------------|-----------------------------------|--------|----|---------|-----|---------|
| Q7NRT4        | 30S ribosomal protein S9          | 14356  | 4  | 36,1538 | 44  | 2,1704  |
| Q7NRV5        | 30S ribosomal protein S16         | 9536   | 7  | 59,0361 | 84  | 8,6455  |
| Q7NU57        | Uncharacterized protein (CV_2846) | 7517   | 2  | 45,4545 | 58  | 77,9891 |
| <b>Q7NUY8</b> | Trigger factor                    | 48546  | 15 | 42,7586 | 187 | 2,7161  |
| Q7NY43        | V <sub>gr</sub> G3 (CV_1432)      | 107856 | 29 | 42,1782 | 363 | 2,6193  |
| <b>Q7P095</b> | ATP synthase subunit beta         | 50024  | 27 | 51,1828 | 324 | 3,949   |
| <b>Q7P097</b> | ATP synthase subunit alpha        | 54676  | 18 | 33,8521 | 217 | 4,4851  |
| <b>Q7P0N9</b> | Acetyltransferase component       | 56484  | 12 | 32,3105 | 147 | 1,1308  |
| Q7P238        | V <sub>gr</sub> G5 (CV_0023)      | 94125  | 17 | 29,9771 | 247 | 1,2663  |

\*Accessions highlighted in bold indicate proteins identified in both assays and are probably contaminant proteins with affinity to the magnetic beads.

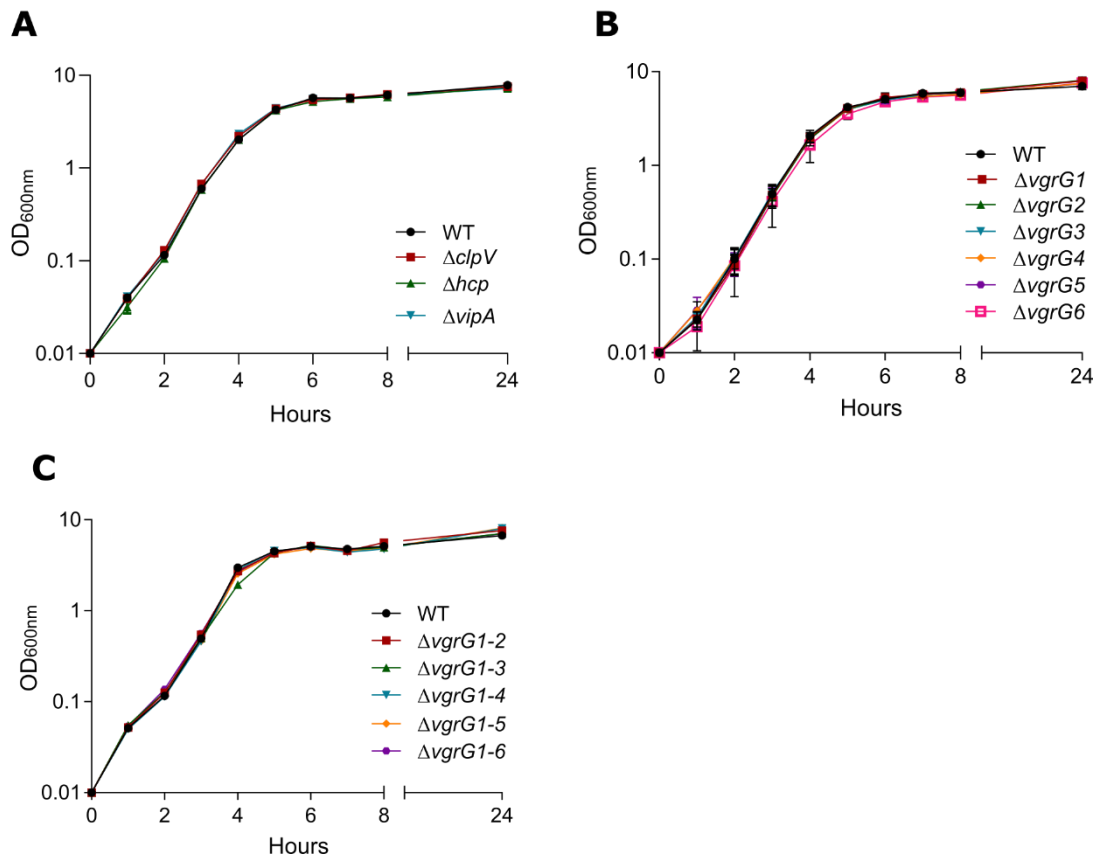

**Fig S1** Growth curves of the indicated strains grown in LB medium. (A) Mutants for T6SS core components. (B) Single mutant strains for each *vgrG*. (C) Sequential *vgrG* mutants. None of these strains showed any growth delay compared to the WT strain.

**A**

|                    | VgrG1<br>(CV_3986) | VgrG2<br>(CV_3975) | VgrG3<br>(CV_1432) | VgrG4<br>(CV_1233) | VgrG5<br>(CV_0023) | VgrG6<br>(CV_0016) |
|--------------------|--------------------|--------------------|--------------------|--------------------|--------------------|--------------------|
| VgrG1<br>(CV_3986) | 100                |                    |                    |                    |                    |                    |
| VgrG2<br>(CV_3975) | 93.43              | 100                |                    |                    |                    |                    |
| VgrG3<br>(CV_1432) | 93.46              | 92.20              | 100                |                    |                    |                    |
| VgrG4<br>(CV_1233) | 76.46              | 76.23              | 71.06              | 100                |                    |                    |
| VgrG5<br>(CV_0023) | 84.36              | 84.27              | 83.55              | 82.50              | 100                |                    |
| VgrG6<br>(CV_0016) | 81.68              | 83.20              | 81.80              | 80.18              | 93                 | 100                |

**B**

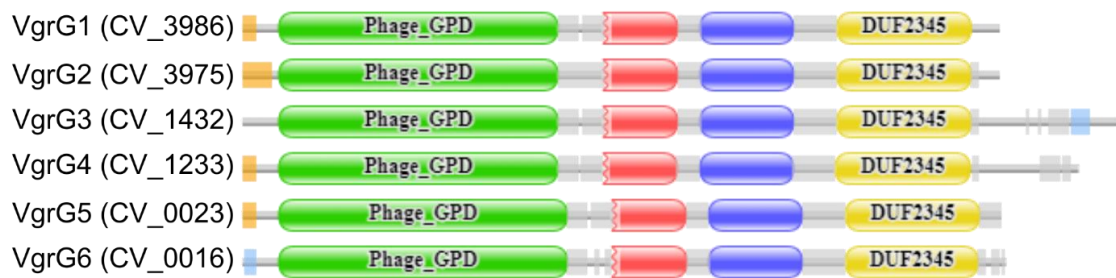

**C**

|       |                                                                |     |
|-------|----------------------------------------------------------------|-----|
| VgrG1 | MDLTSLLSSFASAFNQTQDRLLTLELGSGQVAAEQLLPQSLNGEEGVVSQAYRYQLTCLSPD | 60  |
| VgrG2 | MDLSSLLSFASAFNQTQDRLLTLELGSGQVAAEQLLPQSLNGEEGVVSQAYRYQLTCLSPD  | 60  |
| VgrG3 | MDLDTLLSFASAFNQTQDRLLTLELGSGQVAAEQLLPQSLNGEEGVVSQAYRYQLTCLSPD  | 60  |
| VgrG4 | MDLNALLSFASAFSQQRLISLEFGGGHIAEQLLPLSLDGEEGISRSYRYTLTCLSPD      | 60  |
| VgrG5 | MDLNALLSSFASAFGQDHRPLTLELGSGQIAAEQLLPLSLDGEEGLSRAYRYTVTCLSPD   | 60  |
| VgrG6 | MDLNSLLSSFASAFNQEQRLLTLELGTGQIAAEQLLPLSLDGEEGVSRAYRYTVTCLSPD   | 60  |
|       | *** :*:***** *:*: :*:*: **:*:***** **:*****:*:*** :*****       |     |
| VgrG1 | GAIELKTLTGQAARIGIADAQQQETIRCGVVSQARLMGSDGGFAQYGLTIEPPIALLRHR   | 120 |
| VgrG2 | GAIELKTLTGQAARIGIADAQQQETIRCGVVSQARLMGSDGGFAQYGLTIEPPIALLRHR   | 120 |
| VgrG3 | GAIELKTLTGQAARIGIADAQQQETIRCGVVSQARLMGSDGGFAQYGLTIEPPIALLRHR   | 120 |
| VgrG4 | GNIELKTLTGQPARIGIQDADGDETIKRCVVSQAKLAGSDGGFAKYELTIEPPFALLRHR   | 120 |
| VgrG5 | GHIELKTLTGQPARIGIQDADGDETIKRCVVSQARLAGADGGFARYELTIEPPFALLRHR   | 120 |
| VgrG6 | GHIELKTLTGQPARIGIQDADGDETIKRCMVVSQARLAGADGGFARYELTIEPPFALLRHR  | 120 |
|       | * ***** ***** **:*:*****:*****: * *:*****: * *****:*****       |     |
| VgrG1 | KTSRVFQDLSVDPDIVQQIVHEHQANPVFARAQSIQVKGPAQPRSYCLQYREDDFSFIV    | 180 |
| VgrG2 | RTSRVFQDLSVDPDIVQQIVHEHQANPVFARAQTVQVKGPAQPRSYCLQYREDDFSFIV    | 180 |
| VgrG3 | KTSRVFQDLSVDPDIVQQIVHEHQANPVFARAQSIQVKGPAQPRSYCLQYREDDFSFIV    | 180 |
| VgrG4 | RTSRVFQDLSVDPDIVKQIIGEHQAANPAFARVQTLGIQVKPAQPRSYTLQYRESDFDFIV  | 180 |
| VgrG5 | KTSRVFQDLSVDPDIVKQILAHEHQANPAFARTQTLDIQVKPAPPRSYTLQYRESDFDFIV  | 180 |
| VgrG6 | KTSRVFQDLSVDPDIVKQILAHEHQANPAFARAQTLDIQVRPAPPRSYTLQYRESDFDFIV  | 180 |
|       | :*****:*****:***: *****.***.:*: :*: * * * * * * * * * * .*.*** |     |
| VgrG1 | RLLEEGYAWRFVHVD-----GDSPQVKLVVFDAYSLPPEVERVRFHRSDAT            | 229 |
| VgrG2 | RLLEEGYAWRFVHVD-----GDAPQVKLAVFDAYSLPPEVERVRFHRSDAT            | 229 |
| VgrG3 | RLLEEGYAWRFVHVD-----GDSPQVKLVVFDAYSLPPEVERVRFHRSDAT            | 229 |
| VgrG4 | RLIHEEGYAWRFLHLD-----DDGPQVELAIFDDAHSPLPGSKLERVRFHRSDAS        | 229 |
| VgrG5 | RLLEEGYAWRFVHLDVTERGSEASRGNSPQVELAVFDALSPLPAKLERVRFHRSDAT      | 240 |
| VgrG6 | RLLEEGYAWRFVHLDVTERGSEASRGNSPQVELAVFDAAHSLPAKLERVRFHRSDAT      | 240 |
|       | ***:***** *: * .: **:*:*.:**** * * * *:*****:***:              |     |
| VgrG1 | EEEDGLTDSAARQIVPGNVALATFDYQPVSTQHTGDSSQIDQGGQALQSSLDYDPQ       | 289 |



|       |                                                                                                                                                   |     |
|-------|---------------------------------------------------------------------------------------------------------------------------------------------------|-----|
| VgrG2 | EEEDGLTDWSAARQIVPGNVALATFDYQPVSTQHTGDSSQIDQGPGGQALQSSLDYDPO                                                                                       | 289 |
| VgrG3 | EEEDGLTDWSAARQIVPGNVALATFDYQPVSTQHTGDSSQIDQGPGGQALQSSLDYDPO                                                                                       | 289 |
| VgrG4 | EEEDGLTGWAAARQIVPGGTALASYDYKSVYALQSGDQSRIDQGQAGQSLQSSLRHYDAP                                                                                      | 289 |
| VgrG5 | EEEDGLTEWQAARQIVPGGTALASYDYKPVYSQQNRDSSHIDQGQTGQALQSSLTQYDAP                                                                                      | 300 |
| VgrG6 | EEEDGLTEWQAARQIVPGGTTLVSYDYKPVYSQQNRDSSHIDQGQTGQALQSSLTQYDAP<br>***** *.**:*:***** ..*:.:**:* : : . *.**:*:**** **:*:***** .**                    | 300 |
| VgrG1 | GLYYAGDAEQLSHYARLRQQAHDLQAKTFEGAGSIRGLTAGQWFRLLDDHPAHEADSHEQR                                                                                     | 349 |
| VgrG2 | GLYYAGDAEQLSHYARLRQQAHDLQAKTFEGAGSIRGLTAGQWFRLLDDHPAHEADSHEQR                                                                                     | 349 |
| VgrG3 | GLYYAGDAEQLSHYARLRQQAHDLQAKTFEGAGSIRGLTAGQWFRLLDDHPAHEADSHEQR                                                                                     | 349 |
| VgrG4 | GLYYAGDEEQLGQYAALRQQANDLQAKSFSGTGSGVRGLLPGEWFRLLDEHPAHDSDAPASR                                                                                    | 349 |
| VgrG5 | GLYYADDEEQLGRYAQLRQQANDLQAKSFSGSGSVRGLLPGDWFRLLDDHPAHDGDAENR                                                                                      | 360 |
| VgrG6 | GLYYAGDEEQLGRYAQLRQQANDLQAKSFSGSGSVRGLLPGDWFRLLDDHPAHDGDAENR<br>***** . * ** . : ** ***** : ***** : * . * : ** : ** * : ***** : ***** : . * : . * | 360 |
| VgrG1 | EFVVTGQTLQVRNNLPTDLQSI LPTGDKADAPFRTRIQAQRRIPLTPAYAGTEHAKPKS                                                                                      | 409 |
| VgrG2 | EFVVTGQTLQVRNNLPTDLQSI LPTDDQTDAPFTTRIQAQRRIPLTPAYAGTEHAKPKS                                                                                      | 409 |
| VgrG3 | EFVVTGQTLQVRNNLPTDLQSI LPTGDKADAPFRTRIQAQRRIPLTPAYAGTEHAKPKS                                                                                      | 409 |
| VgrG4 | EFVVTGQSFQARNLPTDLAQHIGAE-QDAAPFTTSIQAQRRIPLTPAYAGTAHAKPTS                                                                                        | 408 |
| VgrG5 | EFVVTGQSFQVRNNLPQDLAQHIGTE-SDATPFATSIQAQRRIPLTPAYAGTEHAKPKS                                                                                       | 419 |
| VgrG6 | EFVVTGQSFQVRNNLPQDLAQHIGTE-SDATPFATSIQAQRRIPLTPAYAGTELAKPTS<br>***** . : * . ***** ** . : : . : ** * ***** : ***** ***** *** . *                  | 419 |
| VgrG1 | RGVQTATVVGPAGEEVHTDQHGRIKQVQFHWQRPDEHPTIGAALDDKSSCWL RVAMP SAGA                                                                                   | 469 |
| VgrG2 | RGVQTATVVGPAGEEVHTDQHGRIKQVQFHWQRPDEHPTIGAALDDKSSCWL RVAMP SAGA                                                                                   | 469 |
| VgrG3 | RGVQTATVVGPAGEEVHTDQHGRIKQVQFHWQRPDEHPTIGAALDDKSSCWL RVAMP SAGA                                                                                   | 469 |
| VgrG4 | QGAQTATVVGPAGEEVHTDEQGRVKVQFHWQRPDEHPTIGAAMDDKSSCWL RVAMP SAGA                                                                                    | 468 |
| VgrG5 | RGVQTATVVGPAGEEVHTDQHGRIKQVQFHWQRPDEHPTIGAALDDKSSCWL RVAMP SAGA                                                                                   | 479 |
| VgrG6 | LGVQTATVVGPAGEEVHTDQHGRIKQVQFHWQRPDEHPTIGASLDDKSSCWL RVAMP SAGA<br>* . ***** : ***** : ***** : ***** : ***** : *****                              | 479 |
| VgrG1 | GWGHQFIPRIGQEVLVDFIEGDIRPVITGVLYNGSHPTPDFSGAGSLPANKT LSGIKSK                                                                                      | 529 |
| VgrG2 | GWGHQFIPRIGQEVLVDFIEGDIRPVITGVLYNGSHPTPDFSGAGSLPANKT LSGIKSK                                                                                      | 529 |
| VgrG3 | GWGHQFIPRIGQEVLVDFIEGDIRPVITGVLYNGSHPTPDFSGAGSLPANKT LSGIKSK                                                                                      | 529 |
| VgrG4 | AWGHQFIPRIGQEVLVNFI EGDIDRPLITGVLYNGSHPPPDSGAGALPANKT LSGIKSK                                                                                     | 528 |
| VgrG5 | GWGHQFIPRIGQEVLVDFIEGDIRPVITGVLYNGSHPTPDFSGAGALPANKT LSGIKSK                                                                                      | 539 |
| VgrG6 | GWGHQFIPRIGQEVLVDFIEGDIRPVITGVLYNGSHPTPDFSGAGSLPANKT LSGIKSK<br>. ***** : ***** : ***** ***** : ***** : *****                                     | 539 |
| VgrG1 | EHQGGGYNELLFDDTPGEVRAKLSSEPGKTQLNQGYLAHPRSNGKAQPRGDGFELRTDHH                                                                                      | 589 |
| VgrG2 | EHQGGGYNELLFDDTPGEVRAKLSSEPGKTQLNQGYLAHPRSNGKALPRGDGFELRTDHH                                                                                      | 589 |
| VgrG3 | EHQGGGYNELLFDDTPGEVRAKLSSEPGKTQLNQGYLAHPRSNGKAQPRGDGFELRTDHH                                                                                      | 589 |
| VgrG4 | EHQGGAYNELLFDDTPGEVRAKLSSELGKTQLNQGF LTHPRSNGKAQPRGEGFELRTDQH                                                                                     | 588 |
| VgrG5 | EHQGGGYNELLFDDTPGEVRAKLSSEPGKTQLNQGYLAHPRSNGKAQPRGDGFELRTDHH                                                                                      | 599 |
| VgrG6 | EHQGGGYNELLFDDTPGEVRAKLSSEPGKTQLNQGYLAHPRSNGKAQPRGDGFELRTDHH<br>***** . ***** : ***** : ***** : ***** : ***** : ***** *                           | 599 |
| VgrG1 | GAIRAAHGLLLTTEAQNAGSGKQLAREHAQSQLDAALSLSQALAE TASGQLADTMETGPD                                                                                     | 649 |
| VgrG2 | GAIRAAHGLLLTTEAQNAGSGKQLAREHAQSQLDAALSLSQALAE TASGQLADAMETGPD                                                                                     | 649 |
| VgrG3 | GAIRAAHGLLLTTEAQNAGSGKQLAREHAQSQLDAALSLSQALAE TASGQLADTMETGPD                                                                                     | 649 |
| VgrG4 | GAIRAAHGLLLTTEAQNAGSGKQLAREHAQSQLQSAVALSQA LAETATGQLADTMETGPD                                                                                     | 648 |
| VgrG5 | GAIRAAHGLLLTTEAQNAGSGKQLAREHAQSQLDAALSLSQALAE TASGQLADAMETGPD                                                                                     | 659 |
| VgrG6 | GAIRAAHGLLLTTEVQNGASGKQLAREHAQSQLDAALSLSQALAE TASGQLADTMETGPE<br>***** : ** . ***** : ***** : ***** : ***** : ***** :                             | 659 |
| VgrG1 | EIGPDNAKAGKKT DGHLQH HADALKAW EAGSNTDKDGKTAKDQAGQQPLL VLSAPAGIAS                                                                                  | 709 |
| VgrG2 | EIGPDNAKAGKKT DGHLQH HVDALKAW EAGSNTDKDGKTAKDQAGQQPLL VLSAPAGIAA                                                                                  | 709 |
| VgrG3 | EIGPDNAKAGKKT DGHLQH HADALKAW EAGSNTDKDGKTAKDQAGQQPLL VLSAPAGIAS                                                                                  | 709 |
| VgrG4 | GIGEDNAKAGK KAKGHM QHQLDALAWEAGSNTDKDGKTAKGQAGQQPQL VLSG PAGIAS                                                                                   | 708 |
| VgrG5 | EIGPDNAKAGKKT DGHLQH HADALKAW EAGSNTDKDGKTAKDQAGQQPLL VLSAPAGIAA                                                                                  | 719 |
| VgrG6 | EIGPDNAKAGK KSDGHLQH HADALKAW EAGSNTDKDGKTAKDQAGQQPLL VLSAPAGIAA<br>** ***** : . ** : ** : ** ***** : ***** . ***** ** . ***** :                  | 719 |
| VgrG1 | LTEQSQTVSAGQNLNLIAQRDANHTTGRRLHNVGQHISL FVAGVKDKV ALKLI AAKGKV                                                                                    | 769 |
| VgrG2 | LTEQSQTVSAGQNLNLVAQRDANHTTGRRWIHN VVGQHISL FVAGVKDKV ALKLI AAKGKV                                                                                 | 769 |
| VgrG3 | LTEQSQTVSAGQNLNLIAQRDANHTTGRRLHNVGQHISL FVAGVKDKV ALKLI AAKGKV                                                                                    | 769 |
| VgrG4 | VTEQSQTLAAGANLNLV VQRDANHTTGRRWVHN VVGKHI S L FVAGIKDNTAMKLI AAKGKV                                                                               | 768 |
| VgrG5 | LTEQSHTVSAGQNLNLVAQRDANHTTGRRLHNVGQHISL FVAGVKDKV ALKLI AAKGKV                                                                                    | 779 |

|       |                                                                                                                         |      |
|-------|-------------------------------------------------------------------------------------------------------------------------|------|
| VgrG6 | LTEQSHTVSAGQNLNLVAQRDANHTTGRRWIHNVGQHISLRFVAGVKDKVALKLIAAKGV<br>:****:*::** *****:..*****:****:*****:***:..*:*****      | 779  |
| VgrG1 | QVQAQSDAMELTADKDVTIMSKERIVVNAKDEILLTA-GGAYIRLKGGNIEVHAPGTVS                                                             | 828  |
| VgrG2 | QVQAQSDAMELTADKDVTITSAKQTIHVNAKQEILLTS-GGAYIRLKDGGKIELHAPGTIS                                                           | 828  |
| VgrG3 | QVQAQSDAMELTADKELTITSAKGVQIAASQEVLLTS-GGGYIRIAGGNIEIHCPSEVS                                                             | 828  |
| VgrG4 | QILAQSDAMEWTADKDVTITSCKDSITIAAKEEILLNVGGGAYIRLAGGNIEVHCPGTVS                                                            | 828  |
| VgrG5 | QVQAQSDAMELTADKDVTITSCKERIVVNAKQEILVTA-GGGYIRIAGGNIEVHCPGTVS                                                            | 838  |
| VgrG6 | Q--AQSDAMELTADKDVAITSVKQKVQFNGKQEILLTS-GGAYVRIKDGKIELHAPGTVS<br>* ***** *****:.* * * : . ..*:*. . **.*:*: .*:**.*. . :* | 836  |
| VgrG1 | VKAAQHKLSPDNMTIPMPVFPKQFCLQ---CMLNAIKSGSPLA-GQ-----                                                                     | 872  |
| VgrG2 | IKGASHNFGSPDQMNPPLPFRFPNT-VCKQ---CMAQAFSQANPLV-AAK-----                                                                 | 872  |
| VgrG3 | VKGASHSLSGPASLSTPTPAFAKPGTGNL---QVIHEFANGFSMN-QGKFVVTDALGVKH                                                            | 884  |
| VgrG4 | VKGAQHNLSPDKMTVAHPAFPKNIPKQNIKLVNHSFVEGDHAVPGMPFKLYADGAMIK                                                              | 888  |
| VgrG5 | VKGASHDLSPASMNPPLPTLPKDKYTP---PNTHPFSE-----                                                                             | 874  |
| VgrG6 | FKGASHDWSGFPASTNLPFPTLPQGDTPS----CQLAAIQHKSGMT-KK-----<br>.***.*** . . * :                                              | 879  |
| VgrG1 | -----                                                                                                                   | 872  |
| VgrG2 | -----                                                                                                                   | 872  |
| VgrG3 | KGVLDEAGKAMVHGLPVGPAQVDFLGRPHKDKADIFPFVEQ-PEAALQQMGETVKGKAMQ                                                            | 943  |
| VgrG4 | QGVLDDETHLPEVHNVLTKYLTLELANGIKRHFNMVPSYAKPPHDELAN-GGINHGEQSD                                                            | 947  |
| VgrG5 | -----                                                                                                                   | 874  |
| VgrG6 | -----                                                                                                                   | 879  |
| VgrG1 | -----                                                                                                                   | 872  |
| VgrG2 | -----                                                                                                                   | 872  |
| VgrG3 | ELGSTLGKTSPLANAMGQASAMAGQAQQALALARNPQSAIPALAAKAKEVLASKAQGAL                                                             | 1003 |
| VgrG4 | KLD-----QYQDF-----GGKGEQA-----                                                                                          | 963  |
| VgrG5 | -----                                                                                                                   | 874  |
| VgrG6 | -----                                                                                                                   | 879  |
| VgrG1 | -----                                                                                                                   | 872  |
| VgrG2 | -----                                                                                                                   | 872  |
| VgrG3 | PSLPKLF                                                                                                                 | 1010 |
| VgrG4 | -----                                                                                                                   | 963  |
| VgrG5 | -----                                                                                                                   | 874  |
| VgrG6 | -----                                                                                                                   | 879  |

**Fig S2** The six VgrG proteins of *C. violaceum* show high sequence identity and similar domain organization. (A) Identity percentages shared among the six VgrG proteins of *C. violaceum*. The values were obtained with the Clustal Omega tool for multiple alignment. (B) Modular domains of VgrG proteins from analysis in the Pfam database. Green, red, and blue indicate the typical VgrG domains. All VgrGs have an additional C-terminal domain, DUF2345 (yellow). VgrG3 contains another additional region at C-terminus with low complexity (light blue). VgrG1, VgrG2, VgrG4, and VgrG5 have putative signal sequences at their N-termini (orange). (C) Multiple sequence alignment of VgrGs using the Clustal Omega tool.
